# Supplementary figures and images for: A Calcium- and GTP-Dependent Transglutaminase in Leishmania infantum
Source: MDPI journal article supplement (doi:10.3390/vetsci10030234), 2023-03-20

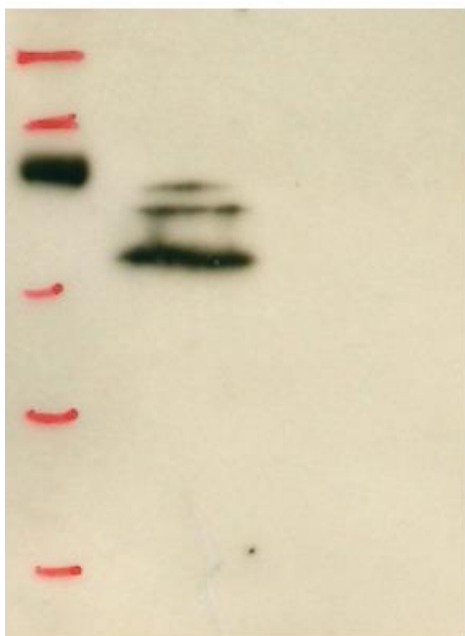

**Figure S1.** WB full membrane for Figures 3.

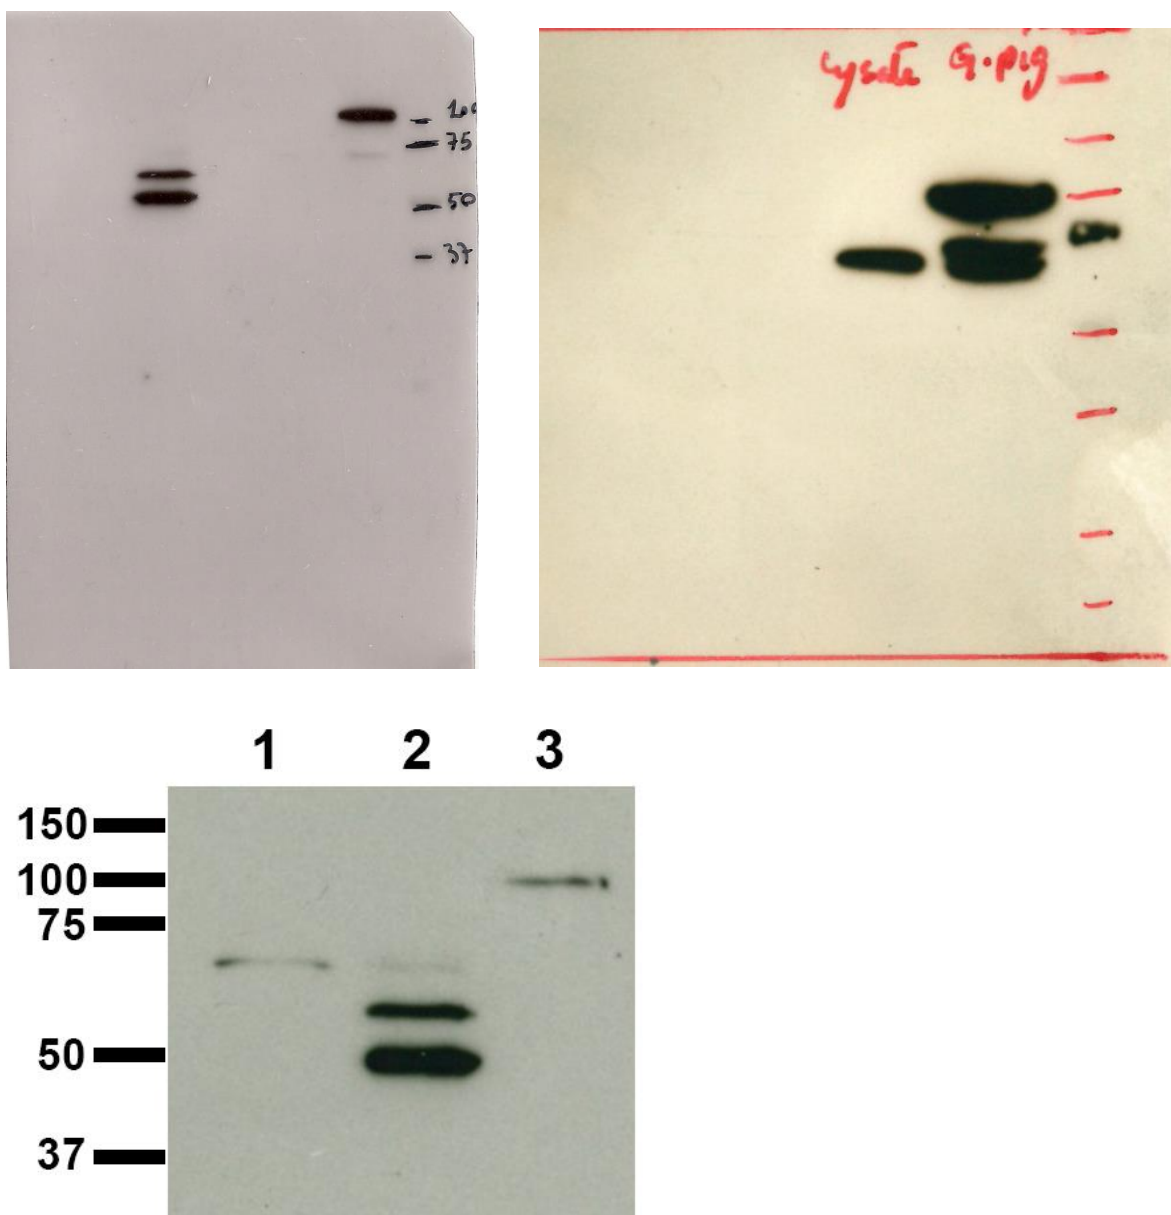

Figure S2. WB full membrane for Figures 5.

Supplement: s1 [file s1]
